# Supplementary material for: Diversity and Evolution of Entomocorticium (Russulales, Peniophoraceae), a Genus of Bark Beetle Mutualists Derived from Free-Living, Wood Rotting Peniophora
Source: MDPI journal article supplement (doi:10.3390/jof7121043), 2021-12-06
Supplement: s1 [file s1]

Lachnocladiaceae clade

Baltazaria

Varariaceae clade

Entomocorticium

Peniophora

Metulodontia clade

Amylostereaceae

Gloeocystidiellum II

Gloeodontia family

Russulaceae

Auriscalpiaceae

Gloeocystidiellum I

Alleurocystidiellum family

Hericiaceae

Stereaceae

Wrightoporia

Albatrellaceae

Echinodontiaceae

Bondarzewiaceae

Amylosporus

Hymenochaetales

Auriculariales

Cantharellales
